# Supplementary material for: Novel Purine Alkaloid Cocrystals with Trimesic and Hemimellitic Acids as Coformers: Synthetic Approach and Supramolecular Analysis
Source: PubMed Central journal article supplement — Cryst Growth Des. 2020 Dec 28;21(1):396–413. doi: 10.1021/acs.cgd.0c01242 (PMC9714640; doi:10.1021/acs.cgd.0c01242), 2020-12-28
Supplement: cg0c01242_si_001.pdf [file cg0c01242_si_001.pdf]

## Electronic Supplementary Information

### *The novel purine alkaloid cocrystals with trimesic and hemimellitic acid as cofomers. Synthetic approach and supramolecular analysis.*

M. R. Goldyn\*, D. Larowska, E. Bartoszak-Adamska<sup>a</sup>

<sup>a</sup> Department of Chemistry, Adam Mickiewicz University, Uniwersytetu Poznańskiego 8, 61-614 Poznań, Poland; \*e-mail: [mateusz.goldyn@amu.edu.pl](mailto:mateusz.goldyn@amu.edu.pl)

#### Contents

S1) Solution-based cocrystallization conditions.

S2) Grinding cocrystallization conditions.

S3) Additional details of crystal structure solution and refinement.

S4) UV-vis measurements - detection wavelengths ( $\lambda_{\text{det}}$ ).

S5) Crystallographic data for alkaloid cocrystals with trimesic acid (TMSA) as cofomer.

S6) Crystallographic data for alkaloid cocrystals with hemimellitic acid (HMLA) as cofomer.

S7) Stacking interactions geometry in the described cocrystals with trimesic (TMSA) and hemimellitic acid (HMLA).

S8) Hydrogen bond parameters in the described cocrystals.

S9) Hirshfeld surface analysis.

S10) Steady-state absorption standard curves.

## S1. Solution-based cocrystallization conditions.

Tab. S1. Solution-based cocrystallization conditions.

| <b>Alkaloid-acid</b>                                                     | <b>Solution-based cocrystallization conditions</b>                                                                                                                                                                                                                                                                                                                                                                                                                                                                                                                                                           |
|--------------------------------------------------------------------------|--------------------------------------------------------------------------------------------------------------------------------------------------------------------------------------------------------------------------------------------------------------------------------------------------------------------------------------------------------------------------------------------------------------------------------------------------------------------------------------------------------------------------------------------------------------------------------------------------------------|
| TBR-TMSA                                                                 | TBR (16.7 mg, 0.093 mmol), TMSA (19.4 mg, 0.092 mmol), MeOH-H <sub>2</sub> O solution (10 ml, v/v 1:1)                                                                                                                                                                                                                                                                                                                                                                                                                                                                                                       |
| TPH-TMSA                                                                 | TPH (19.9 mg, 0.110 mmol), TMSA (23.2 mg, 0.111 mmol), MeOH-CHCl <sub>3</sub> solution (6 ml, v/v 1:1)                                                                                                                                                                                                                                                                                                                                                                                                                                                                                                       |
| TPH-TMSA·2H <sub>2</sub> O                                               | TPH (21.8 mg, 0.121 mmol), TMSA (25.4 mg, 0.121 mmol), MeOH-H <sub>2</sub> O solution (6 ml, v/v 1:1)                                                                                                                                                                                                                                                                                                                                                                                                                                                                                                        |
| CAF-TMSA                                                                 | CAF (24.4 mg, 0.126 mmol), TMSA (26.2 mg, 0.125 mmol), EtOH-H <sub>2</sub> O solution (8 ml, v/v 1:1)<br><i>Good quality single crystals:</i> CAF (21.0 mg, 0.108 mmol), TMSA (43 mg, 0.205 mmol), 1:2 stoichiometric ratio, EtOH-H <sub>2</sub> O solution (10 ml, v/v 1:1)                                                                                                                                                                                                                                                                                                                                 |
| TBR-HMLA                                                                 | TBR (11.9 mg, 0.066 mmol), HMLA (13.6 mg, 0.065 mmol), tBuOH-H <sub>2</sub> O solution (8 ml, v/v 1:1)                                                                                                                                                                                                                                                                                                                                                                                                                                                                                                       |
| TPH-HMLA                                                                 | TPH (15.6 mg, 0.087 mmol), HMLA (18.1 mg, 0.086 mmol), MeCN-H <sub>2</sub> O solution (8 ml, v/v 1:1)                                                                                                                                                                                                                                                                                                                                                                                                                                                                                                        |
| (TPH) <sup>+</sup> ·(HMLA) <sup>-</sup> ·2H <sub>2</sub> O <sup>a)</sup> | TPH (24.0 mg, 0.133 mmol), HMLA (28.1 mg, 0.134 mmol), MeOH-H <sub>2</sub> O solution (6 ml, v/v 1:1) - the clear solution was transferred to four separate vials for slow evaporation. In one of them, crystals of (TPH) <sup>+</sup> ·(HMLA) <sup>-</sup> ·2H <sub>2</sub> O were formed. These crystals were used for crystallization by nucleation.<br>TPH (36.6 mg, 0.203 mmol), HMLA (42.5 mg, 0.202 mmol), MeOH-H <sub>2</sub> O solution (6 ml, v/v 1:1) – the clear solution was transferred to two separate vials for slow evaporation and a few crystals, obtained as above, were added as seeds. |
| CAF-HMLA·H <sub>2</sub> O                                                | CAF (10.9 mg, 0.056 mmol), HMLA (12.7 mg, 0.060 mmol), MeOH-H <sub>2</sub> O solution (6 ml, v/v 1:1)<br><i>Good quality single crystals:</i> CAF (95.2 mg, 0.490 mmol), HMLA (10.3 mg, 0.049 mmol), 10:1 stoichiometric ratio, MeOH-H <sub>2</sub> O solution (6 ml, v/v 1:1)                                                                                                                                                                                                                                                                                                                               |

a) It was complicated to selectively obtain this compound. The use of the different solvent systems, i.e. tBuOH-H<sub>2</sub>O, iPrOH-H<sub>2</sub>O, MeOH-H<sub>2</sub>O most often resulted in obtaining the mixture of anhydrous TPH-HMLA and (TPH)<sup>+</sup>·(HMLA)<sup>-</sup>·2H<sub>2</sub>O with a predominance of the anhydrous form, which was confirmed by PXRD and a few single crystals of dihydrate were visible under the microscope. Several times, it was possible to obtain selectively a dihydrate from the MeOH-H<sub>2</sub>O mixture, but it was not possible to determine the exact conditions favouring the formation of this compound.

## S2. Grinding cocrystallization conditions.

Tab. S2. Grinding cocrystallization conditions.

| <b>Alkaloid-acid</b>                                       | <b>Grinding cocrystallization conditions</b>                                                             |
|------------------------------------------------------------|----------------------------------------------------------------------------------------------------------|
| TBR-TMSA                                                   | TBR (21.1 mg, 0.117 mmol), TMSA (24.6 mg, 0.117 mmol), neat grinding                                     |
| TPH-TMSA                                                   | TPH (15.4 mg, 0.085 mmol), TMSA (18.0 mg, 0.086 mmol), liquid-assisted grinding (20 µl MeOH)             |
| TPH-TMSA·2H <sub>2</sub> O                                 | TPH (14.7 mg, 0.082 mmol), TMSA (17.2 mg, 0.082 mmol), liquid-assisted grinding (20 µl H <sub>2</sub> O) |
| CAF-TMSA                                                   | CAF (16.1 mg, 0.083 mmol), TMSA (17.4 mg, 0.083 mmol), neat grinding                                     |
| TBR-HMLA                                                   | TBR (8.7 mg, 0.048 mmol), HMLA (10.0 mg, 0.048 mmol), neat grinding                                      |
| TPH-HMLA                                                   | TPH (10.9 mg, 0.061 mmol), HMLA (12.8 mg, 0.061 mmol), neat grinding                                     |
| (TPH) <sup>+</sup> ·(HMLA) <sup>-</sup> ·2H <sub>2</sub> O | no obtained by grinding                                                                                  |
| CAF-HMLA·H <sub>2</sub> O                                  | CAF (10.7 mg, 0.055 mmol), HMLA (11.5 mg, 0.055 mmol), neat grinding                                     |

### S3. Additional details of crystal structure solution and refinement.

Tab. S3. Details of crystal structures solution and refinement.

|                                                            |                                                                                                                                                                                                                                                                                                                                                                                                                                                                                                                                                                                                                                                                                                                                                                                                                                                                                                                                                                                                                           |
|------------------------------------------------------------|---------------------------------------------------------------------------------------------------------------------------------------------------------------------------------------------------------------------------------------------------------------------------------------------------------------------------------------------------------------------------------------------------------------------------------------------------------------------------------------------------------------------------------------------------------------------------------------------------------------------------------------------------------------------------------------------------------------------------------------------------------------------------------------------------------------------------------------------------------------------------------------------------------------------------------------------------------------------------------------------------------------------------|
| TBR-TMSA                                                   | All of the H atoms were refined isotropically.                                                                                                                                                                                                                                                                                                                                                                                                                                                                                                                                                                                                                                                                                                                                                                                                                                                                                                                                                                            |
| TPH-TMSA                                                   | The disordered H atoms in two methyl groups of TPH were positioned geometrically using HFIX 127 command and refined using the riding-model with $U_{iso}(H) = 1.2U_{eq}(C)$ . The remaining H atoms were freely refined.                                                                                                                                                                                                                                                                                                                                                                                                                                                                                                                                                                                                                                                                                                                                                                                                  |
| TPH-TMSA·2H <sub>2</sub> O                                 | All of the H atoms were derived from a difference Fourier map, but the disordered methyl group (C16) in TPH was refined as a rotating group using a riding-model with $U_{iso}(H) = 1.2U_{eq}(C)$ , in which H atoms were positioned geometrically using HFIX 127 command. One of two hydrogen atoms in both water molecules is disordered over two positions with occupancies fixed at 0.5 and $U_{iso}$ parameters fixed at 0.5. The geometry of these molecules was modelled used DFIX restraints. The hydrogen atom in one of the carboxyl groups in the TMSA molecule is disordered over two sites with occupancies 0.55:0.45 and with $U_{iso}$ parameters fixed at 0.5. The O-H bond lengths in the above carboxyl group were restrained using the DFIX command. The rest of the H atoms were freely refined.                                                                                                                                                                                                      |
| CAF-TMSA                                                   | The CAF and a half of the TMSA molecule are disordered over two positions with occupancies 0.89 and 0.11. Hydrogen atom in the carboxyl group of TMSA with greater occupancy involved in COOH...N <sub>imidazole</sub> hydrogen bond formation was visible on the difference Fourier map, but in the final refinement, all of the hydrogen atoms were placed in geometrically idealized positions and refined using the riding-model.                                                                                                                                                                                                                                                                                                                                                                                                                                                                                                                                                                                     |
| TBR-HMLA                                                   | The hydrogen atoms in both methyl groups of TBR were positioned geometrically using the AFIX 127 command. They were refined as rotating groups using the riding model with $U_{iso}(H) = 1.2U_{eq}(C)$ . H atom near carbon atom in imidazole ring and H atom near nitrogen atom in pyrimidine ring were freely refined. Hydrogen atoms belonging to the aromatic ring of HMLA (C-H bonds) and hydrogen atoms in carboxylic groups within C7 and C8 atoms were derived from the difference Fourier map and they were freely refined. The carboxyl group within C9 atom is disordered over two positions with anisotropic thermal parameters for oxygen atoms (O5 and O5A, O6 and O6A) with occupancies fixed at 0.5 and disordered hydrogen atom over two positions with fixed occupancies 0.5 positioned in their calculated positions. Additionally, some geometrically restraints (DFIX and FLAT instructions) in the HMLA molecule were used in the refinement.                                                       |
| TPH-HMLA                                                   | One of the carbonyl oxygen atom in HMLA is disordered over two positions with occupancies 0.58(6) (O1) and 0.42(6) (O1A). All hydrogen atoms were freely refined.<br>The final electron density difference map contains a relatively large residual peak (0.47 eÅ <sup>-3</sup> ). When this peak was treated as a water molecule, it would create several short contacts. Ultimately, the water molecule was not considered in the final model due to the very low occupancy, which would be refined to less than 0.05.                                                                                                                                                                                                                                                                                                                                                                                                                                                                                                  |
| (TPH) <sup>+</sup> ·(HMLA) <sup>-</sup> ·2H <sub>2</sub> O | The crystal used for the measurement was identified as a non-merohedral twin. The twin law 1 0 0 0 -1 0 -0.816 0 -1, corresponding to 180° rotation about [100] direct lattice direction, was determined with the program ROTAX. The reflection data were prepared in HKLF 5 format using the "Make HKLF5" function in the WinGX program and they were used in structure refinement. The reflections belonging to the larger domain that were not overlapping with the reflections originating from the smaller component were included in the refinement process. The BASF parameter was refined at 0.251(3).<br>The oxygen atom in one water molecule is disordered on two positions with occupancies constrained at 0.8 and 0.2 for O9 and O9A atoms, respectively. The disordered hydrogen atoms near methyl groups in TPH were placed at a calculated positions using HFIX 127 and refined as riding on their parent atoms. The remaining H atoms were found on the electron density Fourier map and freely refined. |
| CAF-HMLA·H <sub>2</sub> O                                  | ROTAX was used to the twin matrix -1 0 0 0 -1 0 0.113 0 1 identification. It corresponds to a 2-fold rotation axis around [001] reciprocal lattice direction. Therefore, the crystal was recognized as a non-merohedral twin. The diffraction intensity data used to the structure refinement were converted into HKLF 5 format with "Make HKLF 5" function in WinGX. The reflections originating from the smaller domain that are not overlapping with the reflections from the larger component were excluded in the refinement process. The BASF parameter (smaller domain participation) was refined at 0.126(2). The difference Fourier map indicated the location of all hydrogen atoms, but in the final refinement the C16-methyl group in CAF was treated as a rotating group and these atoms were placed at calculated positions (C-H = 0.96 Å) using HFIX 127 command.                                                                                                                                         |

### S4. UV-vis measurements - detection wavelengths ( $\lambda_{det}$ )

Tab. S4. Detection wavelengths ( $\lambda_{det}$ ) of theobromine, theophylline, and caffeine cocrystals.

|                                |                                                            | Detection wavelength - $\lambda_{det}$ nm |
|--------------------------------|------------------------------------------------------------|-------------------------------------------|
| <b>Theobromine cocrystals</b>  | TBR-HMLA                                                   | 290                                       |
|                                | TBR-TMSA                                                   | 273                                       |
| <b>Theophylline cocrystals</b> | TPH-TMSA                                                   | 295                                       |
|                                | TPH-TMSA·2H <sub>2</sub> O                                 | 290                                       |
|                                | TPH-HMLA                                                   | 295                                       |
|                                | (TPH) <sup>+</sup> ·(HMLA) <sup>-</sup> ·2H <sub>2</sub> O | 290                                       |
| <b>Caffeine cocrystals</b>     | CAF-TMSA                                                   | 273                                       |
|                                | CAF-HMLA·H <sub>2</sub> O                                  | 290                                       |

### S5. Crystallographic data for alkaloid cocrystals with trimesic acid (TMSA) as coformer.

Tab. S5 Crystallographic data and refinement details for compounds with trimesic acid.

|                                                                                                                          | TBR-TMSA                                                                                                  | TPH-TMSA                                                                                                  | TPH-TMSA·2H <sub>2</sub> O                                                                                                   | CAF-TMSA                                                                                                   |
|--------------------------------------------------------------------------------------------------------------------------|-----------------------------------------------------------------------------------------------------------|-----------------------------------------------------------------------------------------------------------|------------------------------------------------------------------------------------------------------------------------------|------------------------------------------------------------------------------------------------------------|
| molecular formula                                                                                                        | C <sub>7</sub> H <sub>8</sub> N <sub>4</sub> O <sub>2</sub> ·C <sub>9</sub> H <sub>6</sub> O <sub>6</sub> | C <sub>7</sub> H <sub>8</sub> N <sub>4</sub> O <sub>2</sub> ·C <sub>9</sub> H <sub>6</sub> O <sub>6</sub> | C <sub>7</sub> H <sub>8</sub> N <sub>4</sub> O <sub>2</sub> ·C <sub>9</sub> H <sub>6</sub> O <sub>6</sub> ·2H <sub>2</sub> O | C <sub>8</sub> H <sub>10</sub> N <sub>4</sub> O <sub>2</sub> ·C <sub>9</sub> H <sub>6</sub> O <sub>6</sub> |
| <i>M<sub>r</sub></i>                                                                                                     | 390.31                                                                                                    | 390.31                                                                                                    | 426.34                                                                                                                       | 404.34                                                                                                     |
| crystal system                                                                                                           | monoclinic                                                                                                | monoclinic                                                                                                | triclinic                                                                                                                    | orthorhombic                                                                                               |
| space group                                                                                                              | <i>P</i> 2 <sub>1</sub> / <i>c</i>                                                                        | <i>P</i> 2 <sub>1</sub> / <i>c</i>                                                                        | <i>p</i> 1̄                                                                                                                  | <i>Pbca</i>                                                                                                |
| <i>a</i> , Å                                                                                                             | 7.0932(1)                                                                                                 | 8.6220(2)                                                                                                 | 7.8522(2)                                                                                                                    | 6.6261(2)                                                                                                  |
| <i>b</i> , Å                                                                                                             | 28.5018(5)                                                                                                | 13.4344(2)                                                                                                | 8.9113(2)                                                                                                                    | 16.9741(3)                                                                                                 |
| <i>c</i> , Å                                                                                                             | 16.0248(3)                                                                                                | 14.4816(3)                                                                                                | 14.3420(3)                                                                                                                   | 30.5619(7)                                                                                                 |
| $\alpha$ , °                                                                                                             | 90                                                                                                        | 90                                                                                                        | 78.340(2)                                                                                                                    | 90                                                                                                         |
| $\beta$ , °                                                                                                              | 93.447(2)                                                                                                 | 101.052(2)                                                                                                | 82.760(2)                                                                                                                    | 90                                                                                                         |
| $\gamma$ , °                                                                                                             | 90                                                                                                        | 90                                                                                                        | 66.474(2)                                                                                                                    | 90                                                                                                         |
| <i>V</i> , Å <sup>3</sup>                                                                                                | 3233.86(9)                                                                                                | 1646.31(6)                                                                                                | 900.00(4)                                                                                                                    | 3437.36(14)                                                                                                |
| <i>Z</i>                                                                                                                 | 8                                                                                                         | 4                                                                                                         | 2                                                                                                                            | 8                                                                                                          |
| <i>D<sub>c</sub></i> , gcm <sup>-3</sup>                                                                                 | 1.603                                                                                                     | 1.575                                                                                                     | 1.573                                                                                                                        | 1.563                                                                                                      |
| <i>F</i> (000)                                                                                                           | 1616                                                                                                      | 808                                                                                                       | 444                                                                                                                          | 1680                                                                                                       |
| $\mu$ (Cu K $\alpha$ ), cm <sup>-1</sup>                                                                                 | 1.13                                                                                                      | 1.11                                                                                                      | 1.15                                                                                                                         | 1.09                                                                                                       |
| <i>T</i> , K                                                                                                             | 132(2)                                                                                                    | 129.9(2)                                                                                                  | 130.1(2)                                                                                                                     | 130.0(1)                                                                                                   |
| crystal size, mm                                                                                                         | 0.19 × 0.13 × 0.09                                                                                        | 0.07 × 0.20 × 0.57                                                                                        | 0.06 × 0.10 × 0.25                                                                                                           | 0.02 × 0.05 × 0.28                                                                                         |
| 2 $\theta$ range, °                                                                                                      | 3.1 – 76.2                                                                                                | 4.5 – 76.2                                                                                                | 3.2 – 76.5                                                                                                                   | 2.9 – 70.2                                                                                                 |
| range of indices ( <i>h</i> , <i>k</i> , <i>l</i> )                                                                      | -8→7, -33→35, -18→20                                                                                      | -10→10, -11→16, -16→18                                                                                    | -9→9, -11→11, -18→17                                                                                                         | -8→8, -20→11, -37→36                                                                                       |
| collected reflections                                                                                                    | 14433                                                                                                     | 8349                                                                                                      | 28755                                                                                                                        | 8669                                                                                                       |
| unique reflections                                                                                                       | 6573                                                                                                      | 3407                                                                                                      | 3748                                                                                                                         | 3253                                                                                                       |
| reflections with <i>I</i> > 2 $\sigma$ ( <i>I</i> )                                                                      | 5641                                                                                                      | 2964                                                                                                      | 3566                                                                                                                         | 3046                                                                                                       |
| <i>R<sub>int</sub></i>                                                                                                   | 0.026                                                                                                     | 0.028                                                                                                     | 0.030                                                                                                                        | 0.017                                                                                                      |
| no. of parameters                                                                                                        | 617                                                                                                       | 290                                                                                                       | 341                                                                                                                          | 448                                                                                                        |
| <i>R</i> ( <i>F</i> ), <i>wR</i> ( <i>F</i> <sup>2</sup> ), <i>F</i> <sup>2</sup> > 2 $\sigma$ ( <i>F</i> <sup>2</sup> ) | 0.0570, 0.1573                                                                                            | 0.0417, 0.1117                                                                                            | 0.0375, 0.1073                                                                                                               | 0.0523, 0.1412                                                                                             |
| <i>R</i> ( <i>F</i> ), <i>wR</i> ( <i>F</i> <sup>2</sup> ), all data                                                     | 0.0645, 0.1627                                                                                            | 0.0477, 0.1185                                                                                            | 0.0391, 0.1091                                                                                                               | 0.0548, 0.1427                                                                                             |
| <i>GOF</i>                                                                                                               | 1.128                                                                                                     | 1.016                                                                                                     | 1.076                                                                                                                        | 1.220                                                                                                      |
| Extinction coefficient                                                                                                   | none                                                                                                      | 0.0019(3)                                                                                                 | 0.0043(10)                                                                                                                   | none                                                                                                       |
| $\Delta_{min}$ , $\Delta_{max}$ , eÅ <sup>-3</sup>                                                                       | -0.25, 0.41                                                                                               | -0.29, 0.35                                                                                               | -0.35, 0.47                                                                                                                  | -0.26, 0.24                                                                                                |
| CCDC deposit no.                                                                                                         | 2019779                                                                                                   | 2019776                                                                                                   | 2019782                                                                                                                      | 2019780                                                                                                    |

### S6. Crystallographic data for alkaloid cocrystals with hemimellitic acid (HMLA) as coformer.

Tab. S6 Crystallographic data and refinement details for compounds with hemimellitic acid.

|                                                                                                                          | TBR-HMLA                                                                                                  | TPH-HMLA                                                                                                  | (TPH) <sup>+</sup> ·(HMLA) <sup>-</sup> ·2H <sub>2</sub> O                                                                   | CAF-HMLA·H <sub>2</sub> O                                                                                                    |
|--------------------------------------------------------------------------------------------------------------------------|-----------------------------------------------------------------------------------------------------------|-----------------------------------------------------------------------------------------------------------|------------------------------------------------------------------------------------------------------------------------------|------------------------------------------------------------------------------------------------------------------------------|
| molecular formula                                                                                                        | C <sub>7</sub> H <sub>8</sub> N <sub>4</sub> O <sub>2</sub> ·C <sub>9</sub> H <sub>6</sub> O <sub>6</sub> | C <sub>7</sub> H <sub>8</sub> N <sub>4</sub> O <sub>2</sub> ·C <sub>9</sub> H <sub>6</sub> O <sub>6</sub> | C <sub>7</sub> H <sub>8</sub> N <sub>4</sub> O <sub>2</sub> ·C <sub>9</sub> H <sub>6</sub> O <sub>6</sub> ·2H <sub>2</sub> O | C <sub>8</sub> H <sub>10</sub> N <sub>4</sub> O <sub>2</sub> ·C <sub>9</sub> H <sub>6</sub> O <sub>6</sub> ·H <sub>2</sub> O |
| <i>M<sub>r</sub></i>                                                                                                     | 390.31                                                                                                    | 390.31                                                                                                    | 426.34                                                                                                                       | 422.35                                                                                                                       |
| crystal system                                                                                                           | monoclinic                                                                                                | triclinic                                                                                                 | monoclinic                                                                                                                   | monoclinic                                                                                                                   |
| space group                                                                                                              | <i>C</i> 2/ <i>c</i>                                                                                      | <i>p</i> 1̄                                                                                               | <i>I</i> 2/ <i>a</i>                                                                                                         | <i>P</i> 2 <sub>1</sub> / <i>c</i>                                                                                           |
| <i>a</i> , Å                                                                                                             | 15.4925(10)                                                                                               | 7.5176(5)                                                                                                 | 6.5563(1)                                                                                                                    | 6.7565(2)                                                                                                                    |
| <i>b</i> , Å                                                                                                             | 28.544(2)                                                                                                 | 7.9224(5)                                                                                                 | 20.3491(4)                                                                                                                   | 9.5374(3)                                                                                                                    |
| <i>c</i> , Å                                                                                                             | 7.5608(8)                                                                                                 | 13.7593(6)                                                                                                | 26.8545(5)                                                                                                                   | 28.0941(7)                                                                                                                   |
| $\alpha$ , °                                                                                                             | 90                                                                                                        | 85.132(4)                                                                                                 | 90                                                                                                                           | 90                                                                                                                           |
| $\beta$ , °                                                                                                              | 95.999(8)                                                                                                 | 85.720(4)                                                                                                 | 95.728(2)                                                                                                                    | 90.787(3)                                                                                                                    |
| $\gamma$ , °                                                                                                             | 90                                                                                                        | 88.029(5)                                                                                                 | 90                                                                                                                           | 90                                                                                                                           |
| <i>V</i> , Å <sup>3</sup>                                                                                                | 3325.2(5)                                                                                                 | 813.91(8)                                                                                                 | 3564.90(11)                                                                                                                  | 1810.20(9)                                                                                                                   |
| <i>Z</i>                                                                                                                 | 8                                                                                                         | 2                                                                                                         | 8                                                                                                                            | 4                                                                                                                            |
| <i>D<sub>c</sub></i> , gcm <sup>-3</sup>                                                                                 | 1.559                                                                                                     | 1.593                                                                                                     | 1.589                                                                                                                        | 1.550                                                                                                                        |
| <i>F</i> (000)                                                                                                           | 1616                                                                                                      | 404                                                                                                       | 1776                                                                                                                         | 880                                                                                                                          |
| $\mu$ (Cu K $\alpha$ ), cm <sup>-1</sup>                                                                                 | 1.10                                                                                                      | 1.12                                                                                                      | 1.16                                                                                                                         | 1.10                                                                                                                         |
| <i>T</i> , K                                                                                                             | 294(7)                                                                                                    | 130.1(1)                                                                                                  | 100.0(1)                                                                                                                     | 133(1)                                                                                                                       |
| crystal size, mm                                                                                                         | 0.03 × 0.03 × 0.12                                                                                        | 0.10 × 0.16 × 0.23                                                                                        | 0.03 × 0.05 × 0.28                                                                                                           | 0.11 × 0.12 × 0.19                                                                                                           |
| 2 $\theta$ range, °                                                                                                      | 3.1 – 73.3                                                                                                | 3.2 – 76.1                                                                                                | 2.7 – 75.4                                                                                                                   | 3.2 – 76.5                                                                                                                   |
| range of indices ( <i>h</i> , <i>k</i> , <i>l</i> )                                                                      | -18→12, -34→29, -9→9                                                                                      | -9→9, -9→9, -13→17                                                                                        | -8→8, -25→24, -33→33                                                                                                         | -8→8, -11→11, 0→35                                                                                                           |
| collected reflections                                                                                                    | 6478                                                                                                      | 5860                                                                                                      | 11503                                                                                                                        | 3743                                                                                                                         |
| unique reflections                                                                                                       | 3220                                                                                                      | 3285                                                                                                      | 11503                                                                                                                        | 3743                                                                                                                         |
| reflections with <i>I</i> > 2 $\sigma$ ( <i>I</i> )                                                                      | 2255                                                                                                      | 2858                                                                                                      | 10411                                                                                                                        | 3619                                                                                                                         |
| <i>R<sub>int</sub></i>                                                                                                   | 0.028                                                                                                     | 0.024                                                                                                     | 0.021                                                                                                                        | merged                                                                                                                       |
| no. of parameters                                                                                                        | 305                                                                                                       | 319                                                                                                       | 333                                                                                                                          | 334                                                                                                                          |
| <i>R</i> ( <i>F</i> ), <i>wR</i> ( <i>F</i> <sup>2</sup> ), <i>F</i> <sup>2</sup> > 2 $\sigma$ ( <i>F</i> <sup>2</sup> ) | 0.0495, 0.1197                                                                                            | 0.0413, 0.1130                                                                                            | 0.0343, 0.0915                                                                                                               | 0.0586, 0.1620                                                                                                               |
| <i>R</i> ( <i>F</i> ), <i>wR</i> ( <i>F</i> <sup>2</sup> ), all data                                                     | 0.0765, 0.1354                                                                                            | 0.0474, 0.1196                                                                                            | 0.0384, 0.0937                                                                                                               | 0.0600, 0.1631                                                                                                               |
| <i>GOF</i>                                                                                                               | 1.070                                                                                                     | 1.058                                                                                                     | 1.047                                                                                                                        | 1.137                                                                                                                        |
| $\Delta_{min}$ , $\Delta_{max}$ , eÅ <sup>-3</sup>                                                                       | -0.22, 0.16                                                                                               | -0.20, 0.47                                                                                               | -0.24, 0.24                                                                                                                  | -0.24, 0.36                                                                                                                  |
| CCDC deposit no.                                                                                                         | 2019778                                                                                                   | 2019777                                                                                                   | 2019781                                                                                                                      | 2019783                                                                                                                      |

**S7. Stacking interactions geometry in the described cocrystals with trimesic (TMSA) and hemimellitic acid (HMLA).**

Tab. S7 Geometrical parameters for  $\pi\cdots\pi$  interactions.

| <i>Cocrystal</i>                                                                                                                                              | <i>ArM</i>                      | <i>ArN</i>           | <i>ArM...ArN [Å]<sup>a)</sup></i> | <i>Dihedral angle [°]<sup>b)</sup></i> | <i>Interplanar distance [Å]<sup>c)</sup></i> | <i>Offset [Å]<sup>d)</sup></i> |
|---------------------------------------------------------------------------------------------------------------------------------------------------------------|---------------------------------|----------------------|-----------------------------------|----------------------------------------|----------------------------------------------|--------------------------------|
| <b>TBR·TMSA</b>                                                                                                                                               | Ar1B                            | Ar3B <sup>iv</sup>   | 3.579(1)                          | 5.539(1)                               | 3.233(1)                                     | 1.535(1)                       |
|                                                                                                                                                               | Ar3B                            | Ar1A <sup>v</sup>    | 3.679(1)                          | 0.180(1)                               | 3.265(1)                                     | 1.695(1)                       |
| Symmetry codes: (iv) $x, \frac{1}{2}-y, -\frac{1}{2}+z$ ; (v) $-1+x, \frac{1}{2}-y, \frac{1}{2}+z$                                                            |                                 |                      |                                   |                                        |                                              |                                |
| <b>TPH·TMSA</b>                                                                                                                                               | Ar1                             | Ar3 <sup>iv</sup>    | 3.554(1)                          | 6.872(1)                               | 3.312(1)                                     | 1.290(1)                       |
|                                                                                                                                                               | Ar1                             | Ar3 <sup>v</sup>     | 3.791(1)                          | 5.662(1)                               | 3.281(1)                                     | 1.899(1)                       |
|                                                                                                                                                               | Ar2                             | Ar3 <sup>v</sup>     | 3.475(1)                          | 4.535(1)                               | 3.470(1)                                     | 0.197(1)                       |
| Symmetry codes: (iv) $1-x, 1-y, 1-z$ ; (v) $1-x, -\frac{1}{2}+y, \frac{1}{2}-z$                                                                               |                                 |                      |                                   |                                        |                                              |                                |
| <b>TPH·TMSA·2H<sub>2</sub>O</b>                                                                                                                               | Ar1                             | Ar3 <sup>iv</sup>    | 3.543(1)                          | 3.078(1)                               | 3.258(1)                                     | 1.394(1)                       |
|                                                                                                                                                               | Ar2                             | Ar3 <sup>v</sup>     | 3.516(1)                          | 2.228(1)                               | 3.235(1)                                     | 1.377(1)                       |
| Symmetry codes: (iv) $2-x, 1-y, 1-z$ ; (v) $1-x, 1-y, 1-z$                                                                                                    |                                 |                      |                                   |                                        |                                              |                                |
| <b>CAF·TMSA</b>                                                                                                                                               | Ar2                             | Ar2 <sup>iv(e)</sup> | 3.824(1)                          | 0                                      | 3.156(1)                                     | 2.160(1)                       |
|                                                                                                                                                               | Ar2                             | Ar2 <sup>iv(f)</sup> | 3.802(1)                          | 0                                      | 3.200(1)                                     | 2.053(1)                       |
| Symmetry code: (iv) $1-x, 1-y, 1-z$                                                                                                                           |                                 |                      |                                   |                                        |                                              |                                |
| <b>TBR·HMLA</b>                                                                                                                                               | Ar1                             | Ar1 <sup>i</sup>     | 3.383(1)                          | 0.058(1)                               | 3.346(1)                                     | 0.497(1)                       |
|                                                                                                                                                               | Ar1                             | Ar2 <sup>i</sup>     | 3.718(1)                          | 0.533(1)                               | 3.346(1)                                     | 1.621(1)                       |
|                                                                                                                                                               | Ar2                             | Ar2 <sup>iv</sup>    | 3.574(1)                          | 0                                      | 3.343(1)                                     | 1.263(1)                       |
|                                                                                                                                                               | Ar3                             | Ar3 <sup>v</sup>     | 3.795(1)                          | 4.128(1)                               | 3.631(1)                                     | 1.104(1)                       |
|                                                                                                                                                               | Ar3                             | Ar3 <sup>vi</sup>    | 3.795(1)                          | 4.128(1)                               | 3.607(1)                                     | 1.180(1)                       |
| Symmetry codes: (i) $-x, y, -z+\frac{1}{2}$ ; (iv) $\frac{1}{2}-x, \frac{1}{2}-y, \frac{1}{2}-z$ ; (v) $x, 1-y, \frac{1}{2}+z$ ; (vi) $x, 1-y, z-\frac{1}{2}$ |                                 |                      |                                   |                                        |                                              |                                |
| <b>TPH·HMLA</b>                                                                                                                                               | Ar1                             | Ar3 <sup>iv</sup>    | 3.862(1)                          | 6.103(1)                               | 3.652(1)                                     | 1.254(1)                       |
|                                                                                                                                                               | Ar1                             | Ar3 <sup>v</sup>     | 4.016(1)                          | 6.103(1)                               | 3.555(1)                                     | 1.869(1)                       |
|                                                                                                                                                               | Ar2                             | Ar3 <sup>v</sup>     | 3.763(1)                          | 6.793(1)                               | 3.339(1)                                     | 1.737(1)                       |
| Symmetry codes: (iv) $1-x, 1-y, 1-z$ ; (v) $-x, 1-y, 1-z$                                                                                                     |                                 |                      |                                   |                                        |                                              |                                |
| <b>(TPH)<sup>+</sup>·(HMLA)<sup>-</sup>·2H<sub>2</sub>O</b>                                                                                                   | Ar2                             | Ar2 <sup>iv</sup>    | 3.692(1)                          | 3.795(1)                               | 3.220(1)                                     | 1.807(1)                       |
|                                                                                                                                                               | Ar2                             | Ar2 <sup>ii</sup>    | 3.692(1)                          | 3.795(1)                               | 3.332(1)                                     | 1.590(1)                       |
| Symmetry codes: (ii) $x+\frac{1}{2}, -y+1, z$ ; (iv) $x-\frac{1}{2}, -y+1, z$                                                                                 |                                 |                      |                                   |                                        |                                              |                                |
| <b>CAF·HMLA·H<sub>2</sub>O</b>                                                                                                                                | <i>No aromatic interactions</i> |                      |                                   |                                        |                                              |                                |

Ar1 – pyrimidine ring in purine alkaloid molecule; Ar2 – imidazole ring in purine alkaloid molecule; Ar3 – benzene ring in particular acid molecule; a) The distance between the ring centroids; b) The angle between aromatic ring planes; c) The distance between ArN plane to ArM centroid; d) The distance between ArM and ArN projected onto the ring plane M; (e) and (f) – Ar2 imidazole rings in caffeine molecules with greater (0.89) and smaller occupancy (0.11), respectively.

### S8. Hydrogen bond parameters in the described cocrystals.

Tab. S8 Geometrical parameters for hydrogen bonds.

| Cocrystal                                                                                                                                                                                                                                                 | D—H...A                      | D—H [Å] | H...A [Å]  | D...A [Å]  | D—H...A [°] |
|-----------------------------------------------------------------------------------------------------------------------------------------------------------------------------------------------------------------------------------------------------------|------------------------------|---------|------------|------------|-------------|
| <b>TBR-TMSA</b>                                                                                                                                                                                                                                           | O2A—H2A...N4A <sup>i</sup>   | 1.03(3) | 1.64(3)    | 2.655(2)   | 171(3)      |
|                                                                                                                                                                                                                                                           | O4A—H4A...O7A                | 0.92(4) | 1.74(4)    | 2.649(2)   | 170(4)      |
|                                                                                                                                                                                                                                                           | O6A—H6A...O3B                | 0.89(4) | 1.79(4)    | 2.639(2)   | 160(3)      |
|                                                                                                                                                                                                                                                           | O2B—H2B...N4B                | 0.91(3) | 1.73(3)    | 2.641(2)   | 173(3)      |
|                                                                                                                                                                                                                                                           | O4B—H4B...O7B <sup>ii</sup>  | 0.92(4) | 1.78(4)    | 2.689(2)   | 172(3)      |
|                                                                                                                                                                                                                                                           | O6B—H6B...O3A <sup>iii</sup> | 0.90(4) | 1.76(4)    | 2.641(2)   | 167(3)      |
|                                                                                                                                                                                                                                                           | N1A—H1A...O8B                | 0.97(3) | 1.83(3)    | 2.792(2)   | 171(3)      |
| N1B—H1B...O8A                                                                                                                                                                                                                                             | 0.95(3)                      | 1.82(3) | 2.774(2)   | 175(3)     |             |
| Symmetry codes: (i) $-x+2, y+\frac{1}{2}, -z+\frac{1}{2}$ ; (ii) $-x+1, y+\frac{1}{2}, -z+3/2$ ; (iii) $x-1, y, z+1$ .                                                                                                                                    |                              |         |            |            |             |
| <b>TPH-TMSA</b>                                                                                                                                                                                                                                           | O2—H2...N4                   | 0.90(3) | 1.72(3)    | 2.6164(16) | 176(2)      |
|                                                                                                                                                                                                                                                           | O4—H4...O1 <sup>i</sup>      | 0.90(3) | 1.83(3)    | 2.6777(16) | 156(2)      |
|                                                                                                                                                                                                                                                           | O6—H6...O7 <sup>ii</sup>     | 0.88(3) | 1.75(3)    | 2.6249(15) | 172(2)      |
|                                                                                                                                                                                                                                                           | N3—H3...O5 <sup>iii</sup>    | 0.89(2) | 1.85(2)    | 2.7415(17) | 175(2)      |
| Symmetry codes: (i) $-x+2, y+\frac{1}{2}, -z+\frac{1}{2}$ ; (ii) $x, y+1, z$ ; (iii) $x, y-1, z$ .                                                                                                                                                        |                              |         |            |            |             |
| <b>TPH-TMSA·2H<sub>2</sub>O</b>                                                                                                                                                                                                                           | O2—H2...O9                   | 0.85(2) | 1.78(2)    | 2.6203(14) | 170(2)      |
|                                                                                                                                                                                                                                                           | O4—H4...O3 <sup>i</sup>      | 0.82(2) | 1.81(2)    | 2.6291(13) | 176(3)      |
|                                                                                                                                                                                                                                                           | O6—H6...O7 <sup>ii</sup>     | 0.96(3) | 1.64(3)    | 2.5733(13) | 164(2)      |
|                                                                                                                                                                                                                                                           | N3—H3...O5 <sup>ii</sup>     | 0.90(2) | 1.90(2)    | 2.7901(15) | 171.4(19)   |
|                                                                                                                                                                                                                                                           | O9—H9A...N4                  | 0.88(1) | 1.94(1)    | 2.7930(15) | 162(2)      |
|                                                                                                                                                                                                                                                           | O9—H9B...O9 <sup>iii</sup>   | 0.87(1) | 1.96(1)    | 2.830(2)   | 176(5)      |
|                                                                                                                                                                                                                                                           | O9—H9C...O10 <sup>iv</sup>   | 0.87(1) | 2.21(2)    | 2.8861(18) | 135(2)      |
|                                                                                                                                                                                                                                                           | O10—H10A...O9 <sup>iv</sup>  | 0.88(1) | 2.05(2)    | 2.8861(18) | 160(3)      |
|                                                                                                                                                                                                                                                           | O10—H10B...O1                | 0.89(1) | 2.01(1)    | 2.8830(17) | 168(2)      |
|                                                                                                                                                                                                                                                           | O10—H10C...O10 <sup>ii</sup> | 0.90(1) | 1.87(1)    | 2.757(3)   | 167(3)      |
| O3—H3A...O4 <sup>i</sup>                                                                                                                                                                                                                                  | 0.81(2)                      | 1.82(2) | 2.6291(13) | 171(9)     |             |
| Symmetry codes: (i) $-x-1, -y+1, -z+2$ ; (ii) $-x+1, -y, -z+1$ ; (iii) $-x, -y+2, -z+1$ ; (iv) $-x+1, -y+1, -z+1$ . The H9B, H9C, H10A, H10C atoms occupancy: 0.5. The H3A and H4 atoms occupancies are equal to 0.45 and 0.55, respectively.             |                              |         |            |            |             |
| <b>CAF-TMSA</b>                                                                                                                                                                                                                                           | O6—H6...O3 <sup>i</sup>      | 0.82    | 1.88       | 2.696(2)   | 171         |
|                                                                                                                                                                                                                                                           | O2A—H2A...N4A                | 0.82    | 1.84       | 2.66(3)    | 177         |
|                                                                                                                                                                                                                                                           | O4—H4...O5 <sup>ii</sup>     | 0.82    | 1.80       | 2.613(2)   | 169         |
|                                                                                                                                                                                                                                                           | O2—H2...N4                   | 0.82    | 1.82       | 2.633(3)   | 169         |
| Symmetry codes: (i) $-x+2, y+\frac{1}{2}, -z+3/2$ ; (ii) $-x+2, y-\frac{1}{2}, -z+3/2$ . The O2, N4 atoms occupancy: 0.89. The O2A, N4A atoms occupancy: 0.11.                                                                                            |                              |         |            |            |             |
| <b>TBR-HMLA</b>                                                                                                                                                                                                                                           | O6—H6B...O6 <sup>i</sup>     | 0.82    | 1.72       | 2.53(3)    | 170         |
|                                                                                                                                                                                                                                                           | O6A—H6A...O6A <sup>i</sup>   | 0.91    | 1.86       | 2.76(3)    | 170         |
|                                                                                                                                                                                                                                                           | N1—H1...O1 <sup>ii</sup>     | 0.89(3) | 2.05(3)    | 2.929(3)   | 171(3)      |
|                                                                                                                                                                                                                                                           | O2—H2...O7 <sup>iii</sup>    | 0.89(4) | 1.74(4)    | 2.606(3)   | 163(4)      |
|                                                                                                                                                                                                                                                           | O4—H4...N4                   | 0.93(1) | 1.81(1)    | 2.730(3)   | 168(4)      |
| Symmetry codes: (i) $-x, y, -z+\frac{1}{2}$ ; (ii) $x-\frac{1}{2}, -y+\frac{1}{2}, z+\frac{1}{2}$ ; (iii) $x+\frac{1}{2}, -y+\frac{1}{2}, z-\frac{1}{2}$ . The O6, O6A, H6A, H6B atoms occupancy: 0.50.                                                   |                              |         |            |            |             |
| <b>TPH-HMLA</b>                                                                                                                                                                                                                                           | O4—H4...O8 <sup>i</sup>      | 0.86(3) | 1.86(3)    | 2.6851(17) | 160(2)      |
|                                                                                                                                                                                                                                                           | N3—H3...O5 <sup>ii</sup>     | 0.91(3) | 1.91(3)    | 2.8141(18) | 171(2)      |
|                                                                                                                                                                                                                                                           | O6—H6...O7 <sup>iii</sup>    | 0.90(3) | 1.73(3)    | 2.6225(16) | 169(3)      |
|                                                                                                                                                                                                                                                           | O2—H2...N4                   | 0.91(3) | 1.72(3)    | 2.6330(17) | 177(3)      |
| Symmetry codes: (i) $-x+1, -y+2, -z+1$ ; (ii) $x, y, z-1$ ; (iii) $x, y, z+1$ .                                                                                                                                                                           |                              |         |            |            |             |
| <b>(TPH)<sup>+</sup>·(HMLA)<sup>-</sup>·2H<sub>2</sub>O</b>                                                                                                                                                                                               | O2—H2...O7 <sup>i</sup>      | 0.83(2) | 1.91(3)    | 2.7211(15) | 164(2)      |
|                                                                                                                                                                                                                                                           | O6—H6...O10                  | 0.89(3) | 1.70(3)    | 2.5864(15) | 177(2)      |
|                                                                                                                                                                                                                                                           | O10—H10A...O4 <sup>ii</sup>  | 0.90(3) | 1.85(3)    | 2.7416(17) | 174(2)      |
|                                                                                                                                                                                                                                                           | O10—H10B...O3 <sup>iii</sup> | 0.88(3) | 1.92(3)    | 2.7895(16) | 175(2)      |
|                                                                                                                                                                                                                                                           | O9—H9A...O3 <sup>iii</sup>   | 0.96(3) | 1.76(3)    | 2.692(5)   | 163(2)      |
|                                                                                                                                                                                                                                                           | O9A—H9A...O3 <sup>iii</sup>  | 0.97(3) | 1.76(3)    | 2.67(2)    | 156(3)      |
|                                                                                                                                                                                                                                                           | N3—H3...O9                   | 0.95(3) | 1.68(3)    | 2.619(5)   | 168(2)      |
|                                                                                                                                                                                                                                                           | N3—H3...O9A                  | 0.95(3) | 1.66(3)    | 2.60(2)    | 166(3)      |
|                                                                                                                                                                                                                                                           | N4—H4...O4                   | 1.07(3) | 1.48(3)    | 2.5482(15) | 173(2)      |
|                                                                                                                                                                                                                                                           | O9—H9B...O1 <sup>iv</sup>    | 0.89(3) | 1.84(3)    | 2.703(5)   | 161(2)      |
| O9A—H9B...O1 <sup>iv</sup>                                                                                                                                                                                                                                | 0.95(3)                      | 1.84(3) | 2.67(2)    | 145(3)     |             |
| Symmetry codes: (i) $-x+1, y-\frac{1}{2}, -z+\frac{1}{2}$ ; (ii) $x-\frac{1}{2}, -y+1, z$ ; (iii) $x+\frac{1}{2}, -y+1, z$ ; (iv) $-x+1, y+\frac{1}{2}, -z+\frac{1}{2}$ . The O9 and O9A atoms with occupancies constrained at 0.8 and 0.2, respectively. |                              |         |            |            |             |
| <b>CAF-HMLA·H<sub>2</sub>O</b>                                                                                                                                                                                                                            | O9—H9A...O1 <sup>i</sup>     | 0.93(5) | 1.83(5)    | 2.742(3)   | 167(5)      |
|                                                                                                                                                                                                                                                           | O9—H9B...O3 <sup>ii</sup>    | 0.87(5) | 1.84(5)    | 2.679(3)   | 160(4)      |
|                                                                                                                                                                                                                                                           | O2—H2...O5 <sup>iii</sup>    | 1.00(4) | 1.64(4)    | 2.610(3)   | 162(4)      |
|                                                                                                                                                                                                                                                           | O4—H4...N4                   | 0.95(4) | 1.71(4)    | 2.661(3)   | 176(3)      |
|                                                                                                                                                                                                                                                           | O6—H6...O9                   | 1.01(5) | 1.53(5)    | 2.516(3)   | 165(4)      |
| Symmetry codes: (i) $x, y+1, z$ ; (ii) $-x+1, y+\frac{1}{2}, -z+\frac{1}{2}$ ; (iii) $x, y-1, z$ .                                                                                                                                                        |                              |         |            |            |             |

### S9. Hirshfeld surface analysis.

The tables below (Tab. S9.1-8) represent the percentage contact contribution of each cocrystal component (excluding water molecule) on the Hirshfeld surface area. The figures (Fig. S1-S18) represent a two-dimensional fingerprint for cocrystal components.

Tab. S9.1 Data for TBR-TMSA.

| Contact | TBR-A | TBR-B | TMSA-A | TMSA-B |
|---------|-------|-------|--------|--------|
| C...C   | 4.6   | 4.8   | 3.1    | 6.0    |
| C...H   | 7.1   | 10.2  | 14.0   | 7.8    |
| C...N   | 3.0   | 4.1   | 3.5    | 3.4    |
| C...O   | 6.5   | 5.4   | 8.2    | 9.6    |
| H...H   | 30.3  | 28.5  | 19.7   | 18.8   |
| O...H   | 36.7  | 37.4  | 43.5   | 42.6   |
| O...O   | 2.5   | 1.7   | 3.2    | 4.3    |
| O...N   | 2.4   | 2.7   | 1.2    | 2.9    |
| N...H   | 6.8   | 5.2   | 3.7    | 4.6    |
| N...N   | -     | -     | -      | -      |

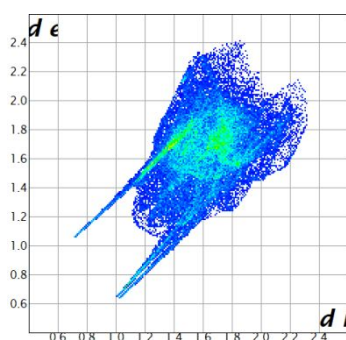

Fig. S1. 2D fingerprint of TBR-A molecule in TBR-TMSA.

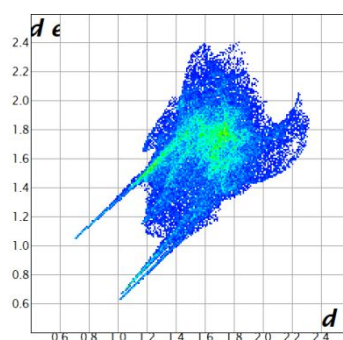

Fig. S2. 2D fingerprint of TBR-B molecule in TBR-TMSA.

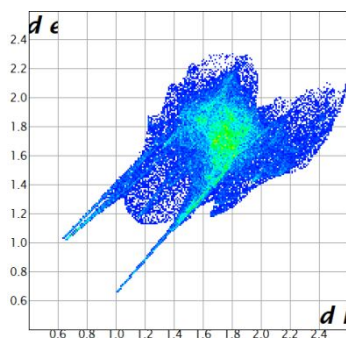

Fig. S3. 2D fingerprint of TMSA-A molecule in TBR-TMSA.

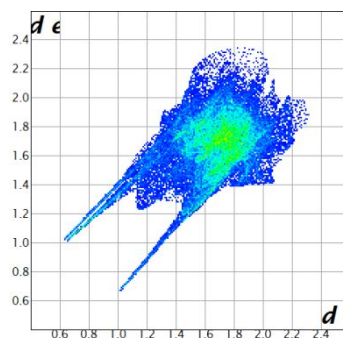

Fig. S4. 2D fingerprint of TMSA-B molecule in TBR-TMSA.

Tab. S9.2 Data for TPH-TMSA.

| Contact | TPH  | TMSA |
|---------|------|------|
| C...C   | 7.2  | 6.7  |
| C...H   | 8.7  | 8.6  |
| C...N   | 4.2  | 4.2  |
| C...O   | 2.7  | 5.1  |
| H...H   | 33.6 | 21.2 |
| O...H   | 34.6 | 44.2 |
| O...O   | 1.7  | 5.0  |
| O...N   | 1.5  | 1.3  |
| N...H   | 5.9  | 3.6  |
| N...N   | -    | -    |

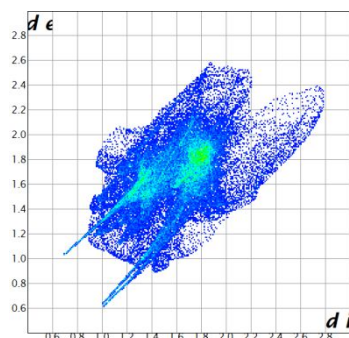

Fig. S5. 2D fingerprint of TPH molecule in TPH-TMSA.

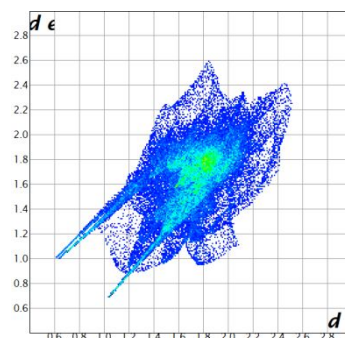

Fig. S6. 2D fingerprint of TMSA molecule in TPH-TMSA.

Tab. S9.3 Data for TPH-TMSA-2H<sub>2</sub>O.

| Contact | TPH  | TMSA |
|---------|------|------|
| C··C    | 6.8  | 6.3  |
| C··H    | 7.9  | 9.2  |
| C··N    | 3.5  | 3.5  |
| C··O    | 4.7  | 5.8  |
| H··H    | 34.8 | 33.4 |
| O··H    | 32.3 | 34.6 |
| O··O    | 2.2  | 4.2  |
| O··N    | 1.5  | 1.2  |
| N··H    | 6.2  | 1.7  |
| N··N    | -    | -    |

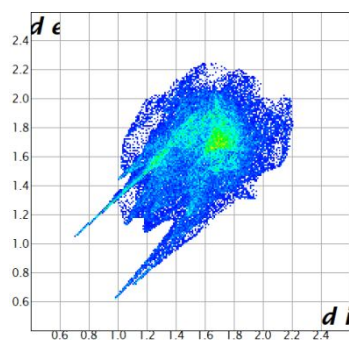

Fig. S7. 2D fingerprint of TPH molecule in TPH-TMSA-2H<sub>2</sub>O.

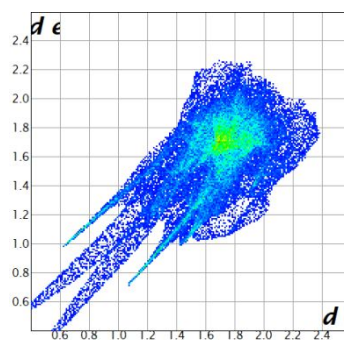

Fig. S8. 2D fingerprint of TMSA molecule in TPH-TMSA-2H<sub>2</sub>O. Short H··H contacts come from a disordered carboxyl group of acid involved in the cyclic acid-acid dimer formation.

Tab. S9.4 Data for CAF-TMSA.

| Contact* | CAF  | TMSA |
|----------|------|------|
| C··C     | 3.9  | 3.7  |
| C··H     | 6.4  | 12.0 |
| C··N     | 1.5  | 0.5  |
| C··O     | 6.7  | 15.8 |
| H··H     | 41.8 | 21.6 |
| O··H     | 28.4 | 36.1 |
| O··O     | 1.0  | 3.6  |
| O··N     | 2.2  | 2.2  |
| N··H     | 7.4  | 4.4  |
| N··N     | 0.7  | -    |

\* contact data was generated for a refined structure with no designed disorder



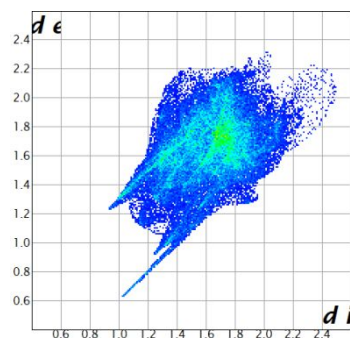

Fig. S9. 2D fingerprint of CAF molecule in CAF-TMSA.

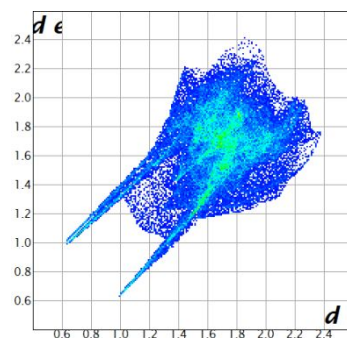

Fig. S10. 2D fingerprint of TMSA molecule in CAF-TMSA.

Tab. S9.5 Data for TBR-HMLA.

| Contact | TBR  | HMLA |
|---------|------|------|
| C··C    | 3.6  | 9.8  |
| C··H    | 5.0  | 6.0  |
| C··N    | 5.0  | -    |
| C··O    | 4.0  | 4.6  |
| H··H    | 37.1 | 28.5 |
| O··H    | 30.8 | 41.5 |
| O··O    | 2.5  | 7.5  |
| O··N    | 2.5  | -    |
| N··H    | 8.3  | 2.1  |
| N··N    | 1.1  | -    |

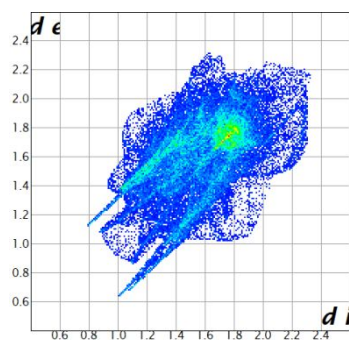

Fig. S11. 2D fingerprint of TBR molecule in TBR-HMLA.

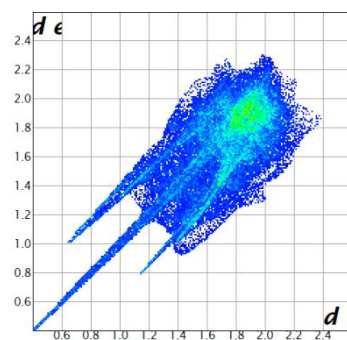

Fig. S12. 2D fingerprint of HMLA molecule in TBR-HMLA. Short H··H contacts come from a disordered carboxyl group of acid involved in the hydroxyl dimer formation.

Tab. S9.6 Data for TPH-HMLA.

| Contact | TPH  | HMLA |
|---------|------|------|
| C··C    | 5.8  | 6.0  |
| C··H    | 6.2  | 5.6  |
| C··N    | 3.5  | 3.6  |
| C··O    | 7.6  | 4.9  |
| H··H    | 25.0 | 31.1 |
| O··H    | 43.4 | 40.3 |
| O··O    | 1.9  | 0.2  |
| O··N    | 2.4  | 2.5  |
| N··H    | 4.4  | 5.8  |
| N··N    | -    | -    |

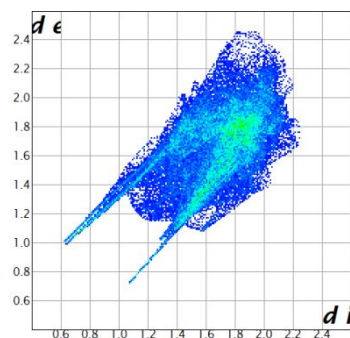

Fig. S13. 2D fingerprint of TPH molecule in TPH-HMLA.

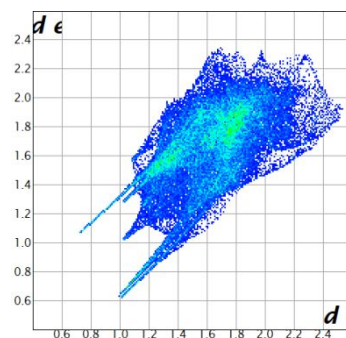

Fig. S14. 2D fingerprint of HMLA molecule in TPH-HMLA.

Tab. S9.7 Data for (TPH)<sup>+</sup>·(HMLA)<sup>-</sup>·2H<sub>2</sub>O.

| Contact | TPH  | HMLA |
|---------|------|------|
| C··C    | 3.2  | 3.9  |
| C··H    | 6.5  | 17.6 |
| C··N    | 2.1  | -    |
| C··O    | 7.4  | 5.0  |
| H··H    | 35.8 | 16.2 |
| O··H    | 36.6 | 54.3 |
| O··O    | 1.1  | 2.9  |
| O··N    | 3.1  | 0.1  |
| N··H    | 3.2  | 0.1  |
| N··N    | 1.1  | -    |

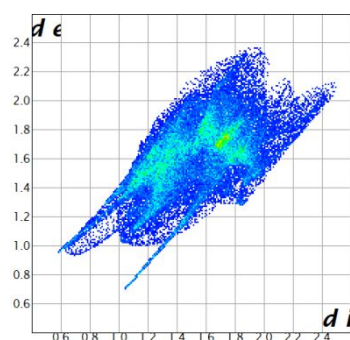

Fig. S15. 2D fingerprint of theophyllinium cation in (TPH)<sup>+</sup>·(HMLA)<sup>-</sup>·2H<sub>2</sub>O.

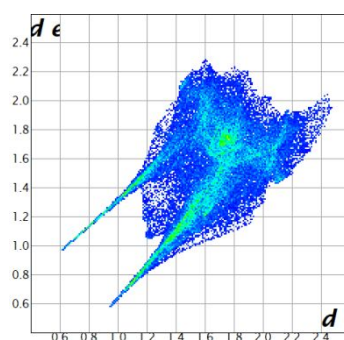

Fig. S16. 2D fingerprint of 2,6-dicarboxybenzoate anion in (TPH)<sup>+</sup>·(HMLA)<sup>-</sup>·2H<sub>2</sub>O.

Tab. S9.8 Data for CAF·HMLA·H<sub>2</sub>O.

| Contact | CAF  | HMLA |
|---------|------|------|
| C··C    | 1.1  | 1.2  |
| C··H    | 11.4 | 16.2 |
| C··N    | 1.1  | 1.2  |
| C··O    | 8.5  | 8.6  |
| H··H    | 37.7 | 23.8 |
| O··H    | 30.9 | 43.4 |
| O··O    | 0.3  | 0.4  |
| O··N    | 1.2  | 1.0  |
| N··H    | 7.8  | 4.2  |
| N··N    | -    | -    |

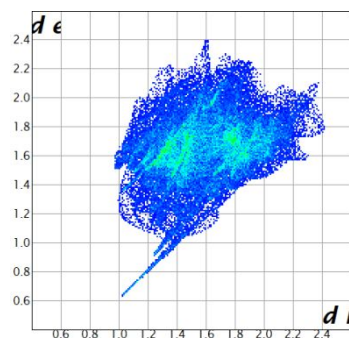

Fig. S17. 2D fingerprint of CAF molecule in CAF-HMLA·H<sub>2</sub>O.

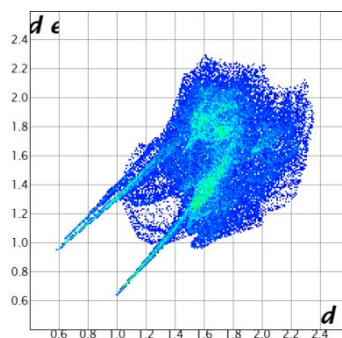

Fig. S18. 2D fingerprint of HMLA molecule in CAF-HMLA·H<sub>2</sub>O.

### S10. Steady-state absorption standard curves

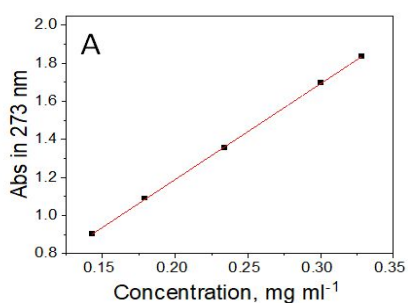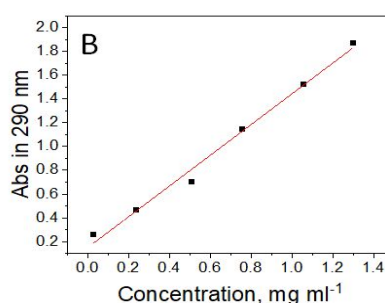

Figure S19. Steady-state absorption standard curves of theobromine cocrystals: (A) TBR-TMSA and (B) TBR-HMLA.

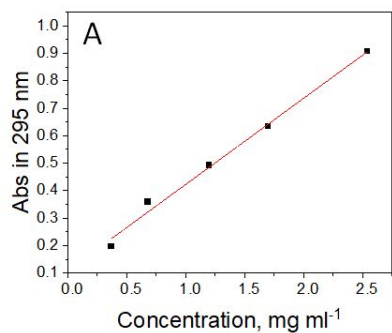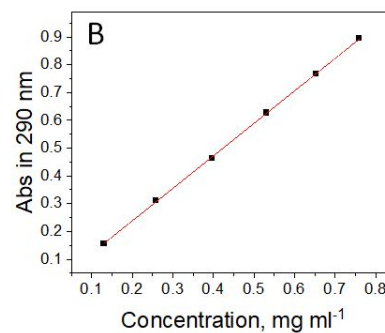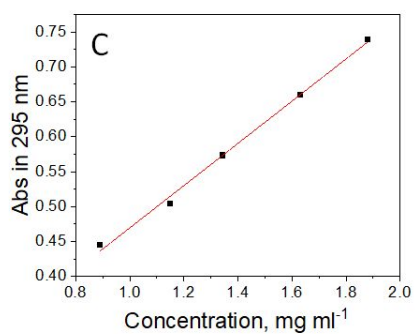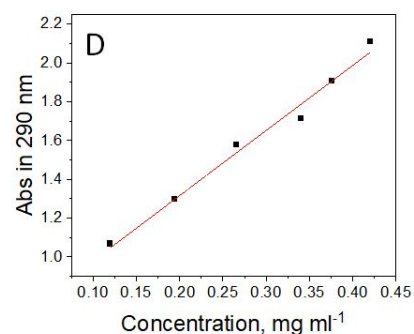

Figure S20. Steady-state absorption standard curves of theophylline cocrystals: (A) TPH-TMSA, (B) TPH-TMSA·2H<sub>2</sub>O, (C) TPH-HMLA and (D) (TPH)<sup>+</sup>·(HMLA)<sup>-</sup>·2H<sub>2</sub>O.

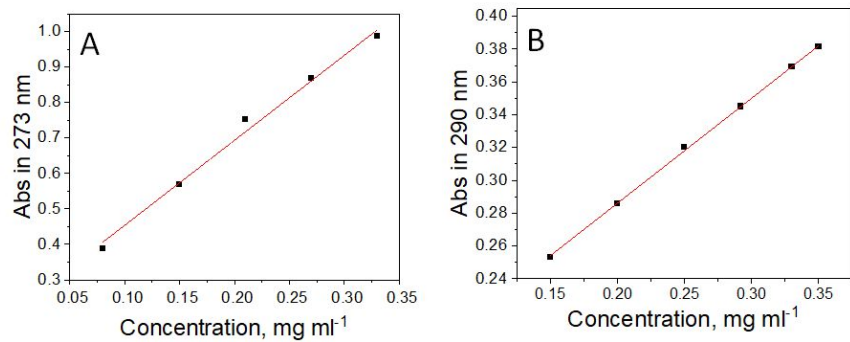

Figure S21. Steady-state absorption standard curves of caffeine cocrystals: (A) CAF-TMSA and (B) CAF-HMLA-H<sub>2</sub>O.
